# Supplementary material for: Whole-genome re-sequencing association study on body size traits at 10-weeks of age in Chinese indigenous geese
Source: Front Vet Sci. 2024 Dec 16;11:1506471. doi: 10.3389/fvets.2024.1506471 (PMC11683055; doi:10.3389/fvets.2024.1506471)
Supplement: Supplementary file 1 [file Table_1.XLS]

## Sheet: Sheet1
Table S1. List of SNPs exceeding the genome-wise significance threshold (P-value <5E-07) for body size traits.
Trait	Chr	SNP	Ref/Alt	Candidate gene	Position	P-vallue
SSL	3	46935981	C/T	GK	intronic	1.38e-15
	13	19742177	G/A	MAP6	intergenic	7.09e-12
	8	11106698	T/C	NONE	intronic	8.99e-11
	3	45120340	T/C	PUR8、ADSL	downstream	2.58e-10
	14	20968062	C/T	PTPRF	intronic	3.52e-10
	15	28401265	C/T	BMT2	intronic	4.77e-09
	11	24220587	G/A	STMN2, STMN1,HEY1	intergenic	4.97e-09
	8	4147257	T/C	LOC100539484	intergenic	5.2e-09
	3	36533197	A/C	OSTCN, MGP-like	upstream	2.73e-08
	28	13193923	C/T	TTYH2	intergenic	2.79e-07
	29	1256456	G/A	KIAA0368	intergenic	3.66e-07
	27	13604716	A/G	THADA	exonic	4.39e-07
NL	12	30503800	C/T	PIAS2	upstream	7.87e-09
	12	30503837	A/G	PIAS2	upstream	3.49e-08
	17	3415713	G/A	NONE	intronic	4.82e-08
	3	3751057	C/T	SMBT2, SCML2	intronic	5.85e-08
	12	30503865	G/T	PIAS2	upstream	7.48e-08
	17	19258083	C/T	ENV	downstream	8.31e-08
	12	26059071	C/G	DNJB5	intronic	1.02e-07
	12	30801383	G/A	SMAD2	intergenic	1.16e-07
	12	17217422	C/T	SGLT1-like	intergenic	1.73e-07
	12	30105684	G/T	ATP5A1	exonic	1.91e-07
	12	24475126	T/C	NPR3	intronic	2.15e-07
	12	7424309	C/T	PO22, CD180	downstream	2.31e-07
	12	7424310	A/G	PO22, CD180	downstream	2.31e-07
	17	20360712	A/G	NONE	intergenic	2.33e-07
	17	20360712	A/G	ITCH	intergenic	2.33e-07
	2	50292824	A/T	FAR1	intronic	2.63e-07
	2	50292826	A/C	FAR1	intronic	2.63e-07
	12	30884675	G/A	ZBTB7C	downstream	2.72e-07
	17	3415745	C/T	NONE	intronic	2.76e-07
	12	26059094	G/A	DNJB5	intronic	2.82e-07
	16	26082755	C/G	PIGZ	intergenic	2.91e-07
	17	3415740	A/T	NONE	intronic	2.92e-07
	17	3415734	C/T	NONE	intronic	3.1e-07
	2	50292822	T/C	FAR1	splicing	3.21e-07
	12	30594862	T/C	SKOR2	intronic	3.26e-07
	12	11950759	T/A	TNPO1	intronic	3.28e-07
	12	24312563	T/G	ADAMTS12	intronic	3.31e-07
	12	25355049	C/G	TPM2	downstream	3.39e-07
	23	18060660	C/T	ZNF462	exonic	3.47e-07
	12	25628209	C/T	AT8B5	intergenic	3.49e-07
	12	30801393	G/A	SMAD2	intergenic	3.54e-07
	12	21162469	T/C	CE028, CCL28	intronic	3.82e-07
	12	21162479	G/A	CE028, CCL28	intronic	3.82e-07
	12	21162482	G/A	CE028, CCL28	intronic	3.82e-07
	12	26059112	C/T	DNJB5	intronic	3.92e-07
	12	21162483	A/T	CE028, CCL28	intronic	4.15e-07
	12	17802851	A/G	ZSWM6	intergenic	4.24e-07
	15	9095561	C/G	PRDM8, GH14523	exonic	4.32e-07
	12	12011728	G/T	FCHO2	intronic	4.94e-07
	12	12011733	A/C	FCHO2	intronic	4.94e-07
	12	12011739	C/T	FCHO2	intronic	4.94e-07
BOL	20	1287002	A/G	RTJK, CMPK2	intronic	6.18e-14
	5	2817884	A/G	MRPL3	intronic	1.09e-12
	8	975845	A/G	CLC	intronic	2.12e-12
	25	13037205	T/C	ABCA3	intronic	6.56e-09
	38	798388	C/T	HDAC7	intronic	5.61e-08
	2	33451557	A/T	ACOT1	upstream	7.59e-08
	8	31224944	G/A	BPHL	intergenic	1.36e-07
KL	15	26888407	T/C	CTNNA2	intronic	3.02e-17
	13	31990664	G/A	RTJK, GK	intergenic	1.38e-10
	6	22659825	G/A	TUSC3	intronic	2.36e-09
	4	18208578	A/G	PLCC, AGPAT3	intergenic	5.57e-08
CW	2	7703734	A/C	TF3B, BRF1	intronic	3.3e-07
	2	7705756	C/T	TF3B, BRF1	intronic	4.53e-07
CD	1	39289602	A/G	AIM1, OR56B2P	intronic	8.84e-08
	4	40609098	G/C	SULT1C4	intronic	4.98e-07
PW	23	18669625	T/C	LMNB1	intronic	4.89e-14
	3	35269625	G/A	SEHL2, LOC100369467	intergenic	6.66e-14
	22	8080154	A/C	GPC3	intronic	3.57e-08
	1	41472846	G/T	DPOLZ, REV3L	intronic	5.21e-08
	6	20422911	A/G	HELT	intergenic	1.05e-07
	1	54957903	C/T	ARID1B	intronic	2.96e-07
SL	33	831318	T/C	MACF1	intronic	4.62e-12
	12	32559836	T/C	OXDC, LAS2	intergenic	2.36e-10
	8	12862066	T/A	PTPN2	intergenic	4.18e-08
	36	52899	C/G	SH3R3	intronic	4.53e-08
	8	1345669	G/A	EPT1	intergenic	6.4e-08
	32	7912362	T/C	USP48	intronic	1.22e-07
SC	7	33091231	A/G	SPOPL	intronic	3.71e-10
	25	7702482	A/G	CYH3	intronic	4.38e-09
	11	33550276	C/T	NECAP1	downstream	7.91e-09
	21	19177374	A/T	ZCH14、BRD4	intergenic	1.89e-08
	21	19177374	A/T	JPH3	intergenic	1.89e-08
	7	3088585	G/A	MYO1B	intronic	5.76e-08
	3	25772943	C/T	TWF1	intergenic	1.27e-07
	7	36694299	C/A	MBD5、DNMT3B	intronic	1.84e-07
	5	43007742	A/G	SNAP47	intronic	1.94e-07
	8	15526589	G/A	RTJK、GK	intergenic	2.44e-07
	1	13762484	T/C	KIDINS220	intronic	2.64e-07
	8	31224944	G/A	RTJK、CYBRD1	intergenic	3.99e-07
