# Supplementary material for: Whole-genome re-sequencing association study on body size traits at 10-weeks of age in Chinese indigenous geese
Source: Front Vet Sci. 2024 Dec 16;11:1506471. doi: 10.3389/fvets.2024.1506471 (PMC11683055; doi:10.3389/fvets.2024.1506471)
Supplement: Supplementary file 2 [file Table_2.XLS]

## Sheet: Sheet1
Abbreviation	Full name
TH	Taihu goose
SC	Sichuan goose
GF	Guangfeng goose
XP	Xupu goose
YJ	Youjiang goose
SSL	Semi-submerged length
NL	Neck length
BOL	Body oblique length
KL	Keel length
SC	Shank circumference
CW	Chest width
CD	Chest depth
PW	Pelvis width
SL	Shank length
GWAS	Genome-wide Association Study
QTLs	Quantitative trait loci
SNPs	Single nucleotide polymorphisms
FarmCPU	The fixed and random model circulating probability unification
GO	Gene Ontology
KEGG	Kyoto Encyclopedia of Genes and Genomes
THADA	Thyroid Adenoma Associated
ATP5A1	ATP Synthase F1 Subunit Alpha
ZNF462	Zinc Finger Protein 462
PRDM8	PR Domain Containing 8
GH14523	Growth Hormone Gene Family
PUR8	Purine Rich Element Binding Protein 8
ADSL	Adenylosuccinate Lyase
OSTCN	Osteoclast-Related Transmembrane Protein
MGP	Matrix Gla Protein
AIM1	Apolipoprotein A-I Regulatory Protein
OR56B2P	Olfactory Receptor 56B2 Pseudogene
SULT1C4	Sulfotransferase Family 1C Member 4
LMNB1	Lamin B1
GCP	GTP-binding protein
DPOLZ	DNA Polymerase Zeta
REV3L	Reversion Inducing Cysteine-Rich Protein With Kazal Motifs-Like
AR1D1B	ADP-Ribosylation Factor 1 Domain Containing 1B
MACF1	Microtubule Actin Crosslinking Factor 1
SH3R3	SH3 Domain Containing Rho GTPase Activating Protein 3
NECAP1	Neuronal Epidermal Growth Factor-Like 1-Containing 1
DNMT3B	DNA Methyltransferase 3 Beta
TUSC3	Tumor Suppressor Candidate 3
CMPK2	Cytosolic CMP-Kinase 2
EPT1	Ethanolamine Phosphate Transferase 1
AGPAT3	1-Acylglycerol-3-Phosphate O-Acyltransferase 3
ADSL	Adenylosuccinate Lyase
GK	Glycerol Kinase
ATP5A1	ATP Synthase F1 Subunit Alpha
ACOT1	Acyl-CoA Thioesterase 1
